# Supplementary material for: Digital Problem-Based Learning in Health Professions: Systematic Review and Meta-Analysis by the Digital Health Education Collaboration
Source: PubMed Central journal article supplement (PMC6416535; doi:10.2196/12945), 2019-02-28
Supplement: jmir_v21i2e12945_app4.pdf [file jmir_v21i2e12945_app4.pdf]

**Multimedia Appendix 4:** Characteristics and effects of the included studies

| Study author,<br>Design, Country                            | Comparison of<br>Learning modality        | Outcome assessments                                                           | Number and types<br>of Participants        | Field of the Study                              | Effect Sizes<br>(based on SMD) <sup>a</sup>                           | Main conclusion                                                               |
|-------------------------------------------------------------|-------------------------------------------|-------------------------------------------------------------------------------|--------------------------------------------|-------------------------------------------------|-----------------------------------------------------------------------|-------------------------------------------------------------------------------|
| <i>DPBL<sup>b</sup> vs Traditional PBL<sup>c</sup></i>      |                                           |                                                                               |                                            |                                                 |                                                                       |                                                                               |
| Alverson <i>et al.</i> 2008<br>[44], RCT <sup>d</sup> , USA | VR <sup>e</sup> PBL vs Traditional<br>PBL | Post-test mean score on<br>questionnaires (Likert type)                       | 36 Medical students<br>(year unspecified)  | Traumatic head<br>injury                        | Not estimable                                                         | Knowledge:<br>Not estimable                                                   |
| Bowdish <i>et al.</i> 2003<br>[22], RCT, USA                | Online PBL vs<br>Traditional PBL          | Post-test mean score on<br>Teaching and Learning<br>Environment Questionnaire | 150, Medical students<br>(first year)      | Human physiology                                | Knowledge:<br>0.04 [-0.33, 0.41]                                      | Knowledge:<br>DPBL = Traditional PBL                                          |
| Dennis 2003 [39],<br>RCT, USA                               | Online PBL vs<br>Traditional PBL          | Post-test mean score on<br>MCQ <sup>f</sup> (30 items)                        | 34, medical students<br>(second year)      | Pregnancy<br>associated urinary<br>incontinence | Knowledge:<br>0.28 [-0.40, 0.95]                                      | Knowledge:<br>DPBL = Traditional PBL                                          |
| Kong 2009 <i>et al.</i><br>[21], RCT, China                 | Online PBL vs<br>traditional PBL          | Post-test mean score on<br>questionnaires                                     | 90, Medical students<br>(year unspecified) | Ophthalmology                                   | Knowledge:<br>0.05 [-0.46, 0.55]                                      | Knowledge:<br>DPBL = Traditional PBL                                          |
| Li 2013 <i>et al.</i> [31],<br>RCT, China                   | Offline PBL vs<br>Traditional PBL         | Post-test mean score on both<br>MCQ (20 items) and Likert<br>scale (5 points) | 120, Medical students<br>(fourth year)     | Dermatology                                     | Knowledge:<br>0.05 [-0.46, 0.55]<br><br>Skills:<br>0.37 [-0.14, 0.88] | Knowledge:<br>DPBL = Traditional PBL<br><br>Skills: DPBL = Traditional<br>PBL |

|                                                             |                                                     |                                                                          |                                             |                                         |                                                                      |                                                                                               |
|-------------------------------------------------------------|-----------------------------------------------------|--------------------------------------------------------------------------|---------------------------------------------|-----------------------------------------|----------------------------------------------------------------------|-----------------------------------------------------------------------------------------------|
| Moeller 2010 <i>et al.</i><br>[43], RCT, Germany            | Online PBL vs<br>Traditional PBL                    | Self-test mean score and<br>Questionnaires                               | 237, Medical students<br>(year unspecified) | Multidisciplinary                       | Knowledge:<br>0.14 [-0.12, 0.40]<br><br>Skills:<br>0.29 [0.03, 0.55] | Knowledge:<br>DPBL = Traditional PBL<br><br>Skills:<br>DPBL > Traditional PBL                 |
| Sobocan 2017 <i>et al.</i><br>[42], RCT, Slovenia           | VP <sup>g</sup> -based PBL vs<br>Traditional PBL    | Post-test mean score on<br>exam test                                     | 34, Medical students<br>(third year)        | Internal medicine                       | Knowledge:<br>-0.07 [-0.74, 0.60]                                    | Knowledge:<br>DPBL = Traditional PBL                                                          |
| Taradi 2005 <i>et al.</i><br>[40], RCT, Croatia             | Online PBL vs<br>Traditional PBL                    | Questionnaires                                                           | 121, Medical students<br>(second year)      | Biochemistry (acid-<br>base physiology) | Knowledge:<br>0.68 [0.28, 1.07]                                      | Knowledge:<br>DPBL > Traditional PBL                                                          |
| <b><i>DPBL vs traditional learning</i></b>                  |                                                     |                                                                          |                                             |                                         |                                                                      |                                                                                               |
| Kong 2009 <i>et al.</i><br>[21], RCT, China                 | Online PBL vs<br>Traditional Learning<br>(lecture)  | Post-test mean score on<br>questionnaires                                | 90, Medical students<br>(year unspecified)  | Ophthalmology                           | Knowledge: 0.9<br>[0.36, 1.43]                                       | Knowledge:<br>DPBL > Traditional<br>Learning                                                  |
| Li 2013 <i>et al.</i> [31],<br>RCT, China                   | Offline PBL vs<br>Traditional Learning<br>(lecture) | Post-test mean score on both<br>MCQ (20 items) and<br>Questions (Essays) | 120, Medical students<br>(fourth year)      | Dermatology                             | Knowledge:<br>0.98 [0.44, 1.51]<br><br>Skills:<br>1.13 [0.58, 1.67]  | Knowledge:<br>DPBL > Traditional<br>Learning<br><br>Skills:<br>DPBL > Traditional<br>Learning |
| Schutte <i>et al.</i> 1997<br>[41], RCT, The<br>Netherlands | VR PBL vs Traditional<br>Learning (textbook)        | Post-test mean score on<br>questions (28 closed and 5<br>open questions) | 68, Medical student<br>(first year)         | Genetics (Global<br>Structure of DNA)   | Knowledge:<br>0.16 [-0.31, 0.64]                                     | Knowledge:<br>DPBL = Traditional<br>Learning                                                  |

<sup>a</sup>Standardized Mean Difference (SMD) values were based on Revman 5.3 calculator, Cochrane Collaboration, <sup>b</sup>Digital Problem Based Learning, <sup>c</sup>Problem Based Learning,

<sup>d</sup>Randomized Controlled Trial, <sup>e</sup>Virtual Reality, <sup>f</sup>Multiple Choice Questions, <sup>g</sup>Virtual Patient
